# Supplementary material for: Methylation statuses of NCOR2, PARK2, and ZSCAN12 signify densities of tumor-infiltrating lymphocytes in gastric carcinoma
Source: PubMed Central journal article supplement (PMC8763922; doi:10.1038/s41598-022-04797-9), 2022-01-17

Methylation statuses of NCOR2, PARK2, and ZSCAN12 signify densities of tumor-infiltrating lymphocytes in gastric carcinoma

Xianyu Wen,<sup>1,2,\*</sup> Hye-Yeong Jin,<sup>1,2,\*</sup> Meihui Li,<sup>1,2</sup> Younghoon Kim,<sup>1,2</sup> Nam-Yun Cho,<sup>2</sup> Yoonjin Kwak,<sup>1</sup> Jeong Mo Bae,<sup>1,2</sup> Hye Seung Lee,<sup>1</sup> Gyeong Hoon Kang<sup>1,2</sup>

<sup>1</sup>Department of Pathology, Seoul National University College of Medicine, Seoul, Korea

<sup>2</sup>Laboratory of Epigenetics, Cancer Research Institute, Seoul National University College of Medicine, Seoul, Korea

\*, These two authors contributed equally to this article.

Supplementary Table 1. Supplementary Table. Summary of Spearman's rho and P-value in correlation tests between quintile subsets of *NCOR2*, *PARK2*, and *ZSCAN12* methylation and CD3 TIL density or CD8 TIL density at the tumor center or invasive front

|                |                 | Quintile subsets  |                    |                     |
|----------------|-----------------|-------------------|--------------------|---------------------|
|                |                 | NCOR2 methylation | PARK2 methylation  | ZSCAN12 methylation |
| Tumor center   | CD3 TIL density | 0.340<br>3.52E-14 | 0.268,<br>3.39E-09 | 0.277<br>1.04E-09   |
|                | CD8 TIL density | 0.332<br>1.72E-13 | 0.293<br>1.09E-10  | 0.274<br>1.77E-09   |
| Invasive front | CD3 TIL density | 0.227<br>1.07E-06 | 0.159<br>6.92E-04  | 0.226<br>1.16E-06   |
|                | CD8 TIL density | 0.250<br>5.27E-08 | 0.150<br>1.25E-03  | 0.279<br>1.10E-09   |

Supplementary Table 2. Demographic and clinicopathologic features of the gastric cancer patients.

| Characteristic      |                          | No. of patients (n=471) |
|---------------------|--------------------------|-------------------------|
| Age, year           | Median (range)           | 61 (23–86)              |
| Sex                 | Male                     | 317 (67.3%)             |
|                     | Female                   | 154 (32.7%)             |
| Subsite             | Involving the cardia     | 133 (28.2%)             |
|                     | Not involving the cardia | 338 (71.8%)             |
| Lymphatic emboli    | Absent                   | 176 (37.4%)             |
|                     | Present                  | 295 (62.6%)             |
| Venous invasion     | Absent                   | 354 (75.2%)             |
|                     | Present                  | 117 (24.8%)             |
| Perineural invasion | Absent                   | 211 (44.8%)             |
|                     | Present                  | 260 (55.2%)             |
| T category          | T2a                      | 109 (23.1%)             |
|                     | T2b                      | 177 (37.6%)             |
|                     | T3                       | 165 (35.0%)             |
|                     | T4                       | 20 (4.2%)               |
| N category          | N0                       | 145 (30.8%)             |
|                     | N1                       | 87 (18.5%)              |
|                     | N2                       | 90 (19.1%)              |
|                     | N3a                      | 95 (20.2%)              |
|                     | N3b                      | 54 (11.5%)              |
| M category          | M0                       | 416 (88.3%)             |
|                     | M1                       | 55 (11.7%)              |

Supplementary Table 3. Oligonucleotide sequences for the three DNA methylation markers

| Gene    |         | Oligonucleotide sequences               |
|---------|---------|-----------------------------------------|
| NCOR2   | forward | GATCGTTGGAGGTTTCGACGTT                  |
|         | reverse | AACCCACCGACGACAAATACG                   |
|         | probe   | 6FAM-CCGCCTAACCCACGACTAAACCGTAAA-BHQ1   |
| PARK2   | forward | GGATGGAACGGTTGCGATAGATT                 |
|         | reverse | AACGAATACTATCCTAACACTAACTCAAC           |
|         | probe   | 6FAM-ACAACGCAAAACCGAACCCGAACGAC-BHQ1    |
| ZSCAN12 | forward | CGCGTTTCGGTTTGGGAGTA                    |
|         | reverse | CTCCTCTCTATAATTACCCGACCG                |
|         | probe   | 6FAM-CGCCCCAACTAAACAACGCAAATTCCAAC-BHQ1 |

Supplementary Figure 1. MethyLight assay of three methylation markers (NCOR2, PARK2, and ZSCAN12) in gastric cancer cell lines (NUGC-2, SNU-16, SNU-620, and SNU-638) as a negative control and CD8-positive T cells (from two gastric cancer patients) as a positive control

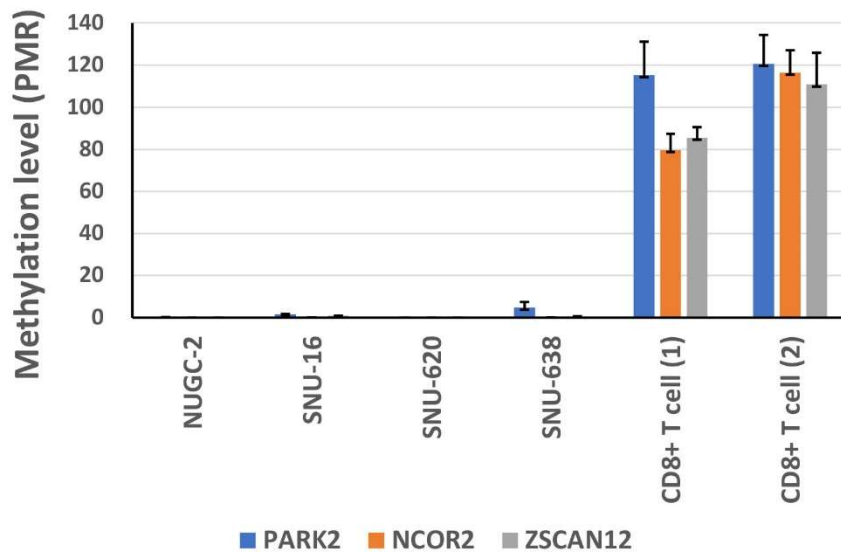

Supplementary Figure 2. Representative photomicrographs demonstrating histologic (A, B, and C) and CD8 immunohistochemistry features (D, E, and F) of gastric cancers (GCs). A GC with methylation sum score of 0 (A & D); a GC with methylation sum score of 1 (B & E); a GC with methylation sum score of 3 (C & F)

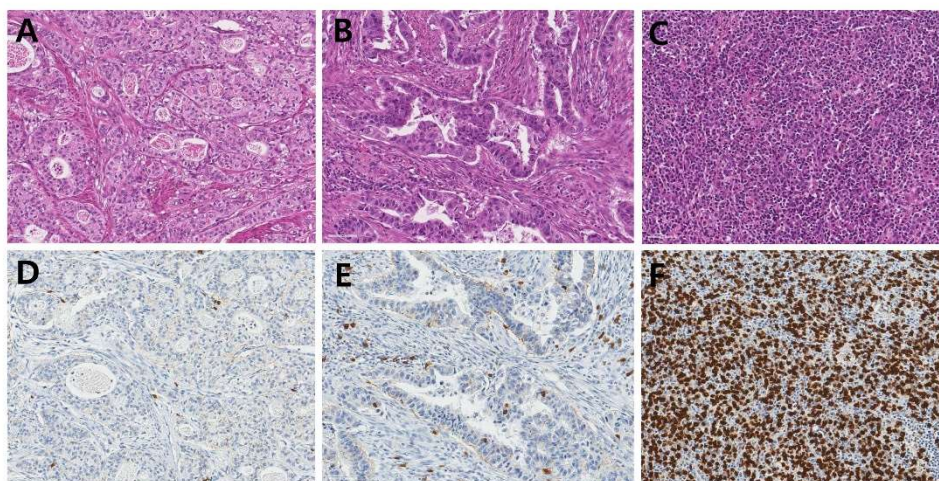

Supplementary Figure 3. Kaplan-Meier survival analysis of overall survival (A) and recurrence-free survival (B) with respect to the combinatory statuses of microsatellite instability (MSI) and methylation sum score. Gastric cancer cases with methylation sum score of 0-2 were classified into methylation sum score (MeSc)-low, which gastric cancer cases with methylation sum score of 3 were classified into MeSc-high.

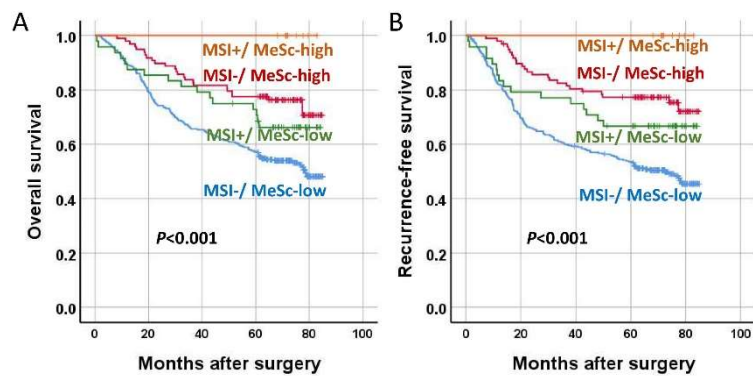

Supplement: 41598_2022_4797_MOESM1_ESM.pdf [file 41598_2022_4797_MOESM1_ESM.pdf]
